# Supplementary material for: Booster dose of self-amplifying SARS-CoV-2 RNA vaccine vs. mRNA vaccine: a phase 3 comparison of ARCT-154 with Comirnaty®
Source: bioRxiv or medRxiv preprint supplement (doi:10.1101/2023.07.13.23292597), 2023-07-13
Supplement: Supplementary file [file media-1.pdf]

## Supplementary material

|                                                                                         |         |
|-----------------------------------------------------------------------------------------|---------|
| <b>Table 1:</b> Study sites and locations                                               | page 2  |
| <b>Table 2:</b> Severity scale for local reactions                                      | page 3  |
| <b>Table 3:</b> Severity scale for systemic adverse events                              | page 4  |
| <b>Table 4:</b> Immunogenicity comparisons according to age category                    | page 5  |
| <b>Table 5:</b> Immunogenicity comparisons according to gender                          | page 6  |
| <b>Table 6:</b> Immunogenicity comparisons according to interval since last vaccination | page 7  |
| <b>Table 7:</b> Duration of local reactions                                             | page 8  |
| <b>Table 8:</b> Duration of systemic adverse events                                     | page 9  |
| <b>Table 9:</b> Unsolicited adverse events according to MedDRA                          | page 10 |

**Supplementary table 1.** Study sites and ethical committees for the study.

| <b>Site No.</b> | <b>Site name</b>                              | <b>Location</b> | <b>Ethical committee</b>                                         |
|-----------------|-----------------------------------------------|-----------------|------------------------------------------------------------------|
| <b>1</b>        | Hakata CL                                     | Fukuoka         | Hakata Clinic Institutional Review Board                         |
| <b>2</b>        | Shinanozaka CL                                | Tokyo           | Institutional review board of Shinanozaka clinic                 |
| <b>3</b>        | Higashi-Shinjuku CL                           | Tokyo           | P-One Clinic, Keikokai Medical Corp. IRB                         |
| <b>4</b>        | P-One CL                                      | Tokyo           |                                                                  |
| <b>5</b>        | Osaka Pharmacology Clinical Research Hospital | Osaka           | Medical Corporation Heishinkai OPHAC Hospital IRB                |
| <b>6</b>        | ToCROM                                        | Tokyo           |                                                                  |
| <b>7</b>        | Shin-Sapporo HP                               | Hokkaido        | Kobori Central Clinical Research Ethics Committee                |
| <b>8</b>        | LUNA                                          | Kanagawa        |                                                                  |
| <b>9</b>        | Medimesse Sakurajyuji                         | Kumamoto        |                                                                  |
| <b>10</b>       | Fukushima Medical HP                          | Fukushima       | Fukushima Medical University Hospital Institutional Review Board |
| <b>11</b>       | Juntendo HP                                   | Tokyo           | Juntendo University Hospital Institutional Review Board          |

**Supplementary table 2.** Severity scale for local reactions

| <b>Local Reaction</b> | <b>Mild<br/>(Grade 1)</b>                         | <b>Moderate<br/>(Grade 2)</b>                                                     | <b>Severe<br/>(Grade 3)</b>                                  | <b>Potentially life<br/>threatening<br/>(Grade 4)</b> |
|-----------------------|---------------------------------------------------|-----------------------------------------------------------------------------------|--------------------------------------------------------------|-------------------------------------------------------|
| Pain                  | Does not interfere with activity                  | Repeated use of non-narcotic pain reliever > 24 hours or interferes with activity | Any use of narcotic pain reliever or prevents daily activity | Emergency room (ER) visit or hospitalisation          |
| Tenderness            | Mild discomfort to touch                          | Discomfort with movement                                                          | Significant discomfort at rest                               | ER visit or hospitalisation                           |
| Erythema / Redness    | 2.5 – 5.0 cm                                      | 5.1 – 10 cm                                                                       | > 10 cm                                                      | Necrosis or exfoliative dermatitis                    |
| Induration / Swelling | 2.5 – 5.0 cm and does not interfere with activity | 5.1 – 10 cm or interferes with activity                                           | > 10 cm or prevents daily activity                           | Necrosis                                              |

**Supplementary table 3.** Severity scale for systemic adverse events

| <b>Systemic adverse event</b> | <b>Mild<br/>(Grade 1)</b>                                | <b>Moderate<br/>(Grade 2)</b>                                                             | <b>Severe<br/>(Grade 3)</b>                                                  | <b>Potentially life threatening<br/>(Grade 4)</b> |
|-------------------------------|----------------------------------------------------------|-------------------------------------------------------------------------------------------|------------------------------------------------------------------------------|---------------------------------------------------|
| Fever (°C)                    | 38.0° – 38.4°                                            | 38.5° – 38.9°                                                                             | 39.0° – 40.0°                                                                | > 40.0°                                           |
| Nausea / vomiting             | No interference with activity or 1 – 2 episodes/24 hours | Some interference with activity or > 2 episodes/24 hours                                  | Prevents daily activity, requires outpatient IV hydration                    | ER visit or hospitalisation for hypotensive shock |
| Diarrhoea                     | 2 – 3 loose stools or < 400 g/24 hr                      | 4 – 5 stools or 400 – 800 g/24 hr                                                         | 6 or more watery stools or > 800 g/24 hr or requires outpatient IV hydration | ER visit or hospitalisation                       |
| Headache                      | No interference with activity                            | Repeated use of non- narcotic pain reliever > 24 hours or some interference with activity | Significant; any use of narcotic pain reliever or prevents daily activity    | ER visit or hospitalisation                       |
| Fatigue                       | No interference with activity                            | Some interference with activity                                                           | Significant; prevents daily activity                                         | ER visit or hospitalisation                       |
| Myalgia                       | No interference with activity                            | Some interference with activity                                                           | Significant; prevents daily activity                                         | ER visit or hospitalisation                       |
| Dizziness, arthralgia, chills | No interference with activity                            | Some interference with activity not requiring medical intervention                        | Prevents daily activity and requires medical intervention                    | ER visit or hospitalisation                       |

**Supplementary table 4.**

Geometric mean titres (GMT) of neutralising antibodies and seroresponse rates (SRR) at Day 29 with non-inferiority comparisons after ARCT-154 and Comirnaty (PPS-1) – **according to age category**

| Assay                                                            | Booster vaccine = | GMT<br>(95% CI)              |                             | Seroresponse rate<br>n / N<br>%<br>(95% CI) |                              |
|------------------------------------------------------------------|-------------------|------------------------------|-----------------------------|---------------------------------------------|------------------------------|
|                                                                  |                   | ARCT-154                     | Comirnaty                   | ARCT-154                                    | Comirnaty                    |
| <b>Neutralising antibodies against SARS-CoV-2 Wuhan-Hu-1</b>     |                   |                              |                             |                                             |                              |
|                                                                  |                   | N = 374                      | N = 366                     | 244 / 374                                   | 188 / 366                    |
| <b>&lt; 65 years of age</b>                                      |                   | <b>5628</b><br>(4310, 7349)  | <b>3953</b><br>(3007, 5197) | <b>65.2%</b><br>(60.2, 70.1)                | <b>51.4%</b><br>(46.1, 56.6) |
| <b>GMT ratio or SRR difference (95% CI)</b>                      |                   | <b>1.42</b> (1.25, 1.62)     |                             | <b>13.9%</b> (6.8, 20.8)                    |                              |
|                                                                  |                   | N = 11                       | N = 8                       | 7 / 11                                      | 5 / 8                        |
| <b>≥ 65 years of age</b>                                         |                   | <b>6818</b><br>(4055, 11464) | <b>3218</b><br>(1684, 6149) | <b>63.6%</b><br>(30.8, 89.1)                | <b>62.5%</b><br>(24.5, 91.5) |
| <b>GMT ratio or SRR difference (95% CI)</b>                      |                   | <b>2.12</b> (0.92, 4.87)     |                             | <b>1.1%</b> (-39.7, 43.3)                   |                              |
| <b>Neutralising antibodies against SARS-CoV-2 Omicron BA.4/5</b> |                   |                              |                             |                                             |                              |
|                                                                  |                   | N = 374                      | N = 366                     | 261 / 374                                   | 210 / 366                    |
| <b>&lt; 65 years of age</b>                                      |                   | <b>2556</b><br>(1689, 3870)  | <b>1967</b><br>(1286, 3010) | <b>69.8%</b><br>(64.9, 74.4)                | <b>57.4%</b><br>(52.1, 62.5) |
| <b>GMT ratio or SRR difference (95% CI)</b>                      |                   | <b>1.30</b> (1.07, 1.58)     |                             | <b>12.4%</b> (5.5, 19.2)                    |                              |
|                                                                  |                   | N = 11                       | N = 8                       | 8 / 11                                      | 7 / 8                        |
| <b>≥ 65 years of age</b>                                         |                   | <b>2616</b><br>(1180, 5801)  | <b>2053</b><br>(761, 5537)  | <b>72.7%</b><br>(39.0, 94.0)                | <b>87.5%</b><br>(47.3, 99.7) |
| <b>GMT ratio or SRR difference (95% CI)</b>                      |                   | <b>1.27</b> (0.36, 4.56)     |                             | <b>-14.8%</b> (-48.9, 26.7)                 |                              |

\* GMT and GMT ratio calculated using an ANCOVA model.

**Supplementary table 5.**

Geometric mean titres (GMT) of neutralising antibodies and seroresponse rates (SRR) at Day 29 with non-inferiority comparisons after ARCT-154 and Comirnaty (PPS-1) – **striated by Gender**

| Assay                                                            | Booster vaccine =                           | GMT<br>(95% CI)              |                             | Seroresponse rate<br>n / N<br>%<br>(95% CI) |                              |
|------------------------------------------------------------------|---------------------------------------------|------------------------------|-----------------------------|---------------------------------------------|------------------------------|
|                                                                  |                                             | ARCT-154                     | Comirnaty                   | ARCT-154                                    | Comirnaty                    |
| <b>Neutralising antibodies against SARS-CoV-2 Wuhan-Hu-1</b>     |                                             |                              |                             |                                             |                              |
|                                                                  |                                             | N = 157                      | N = 162                     | 106 / 157                                   | 89 / 162                     |
| <b>Male</b>                                                      |                                             | <b>7433</b><br>(5003, 11041) | <b>5107</b><br>(3426, 7613) | <b>67·5%</b><br>(59·6, 74·8)                | <b>54·9%</b><br>(46·9, 62·8) |
|                                                                  | <b>GMT ratio or SRR difference (95% CI)</b> | <b>1·46</b> (1·20, 1·76)     |                             | <b>12·6%</b> (1·9, 23·0)                    |                              |
|                                                                  |                                             | N = 228                      | N = 212                     | 145 / 228                                   | 104 / 212                    |
| <b>Female</b>                                                    |                                             | <b>4481</b><br>(3119, 6437)  | <b>3138</b><br>(2156, 4566) | <b>63·6%</b><br>(57·0, 69·8)                | <b>49·1%</b><br>(42·1, 56·0) |
|                                                                  | <b>GMT ratio or SRR difference (95% CI)</b> | <b>1·43</b> (1·21, 1·69)     |                             | <b>14·5%</b> (5·3, 23·6)                    |                              |
| <b>Neutralising antibodies against SARS-CoV-2 Omicron BA.4/5</b> |                                             |                              |                             |                                             |                              |
|                                                                  |                                             | N = 157                      | N = 162                     | 109 / 157                                   | 95 / 162                     |
| <b>Male</b>                                                      |                                             | <b>3001</b><br>(1592, 5657)  | <b>2549</b><br>(1345, 4833) | <b>69·4%</b><br>(61·6, 76·5)                | <b>58·6%</b><br>(50·6, 66·3) |
|                                                                  | <b>GMT ratio or SRR difference (95% CI)</b> | <b>1·18</b> (0·86, 1·60)     |                             | <b>10·8%</b> (0·2, 21·1)                    |                              |
|                                                                  |                                             | N = 228                      | N = 212                     | 160 / 228                                   | 122 / 212                    |
| <b>Female</b>                                                    |                                             | <b>2214</b><br>(1277, 3838)  | <b>1572</b><br>(889, 2779)  | <b>70·2%</b><br>(63·8, 76·0)                | <b>57·5%</b><br>(50·6, 64·3) |
|                                                                  | <b>GMT ratio or SRR difference (95% CI)</b> | <b>1·41</b> (1·09, 1·81)     |                             | <b>12·6%</b> (3·7, 21·5)                    |                              |

\* GMT and GMT ratio calculated using an ANCOVA model.

**Supplementary table 6.**

Geometric mean titres (GMT) of neutralising antibodies and seroresponse rates (SRR) at Day 29 with non-inferiority comparisons after ARCT-154 and Comirnaty (PPS-1) – **striated according to time since last vaccination**

| Assay                                                            | Booster vaccine =                           | GMT<br>(95% CI)              |                              | Seroresponse rate<br>n / N<br>%<br>(95% CI) |                              |
|------------------------------------------------------------------|---------------------------------------------|------------------------------|------------------------------|---------------------------------------------|------------------------------|
|                                                                  |                                             | ARCT-154                     | Comirnaty                    | ARCT-154                                    | Comirnaty                    |
| <b>Neutralising antibodies against SARS-CoV-2 Wuhan-Hu-1</b>     |                                             |                              |                              |                                             |                              |
| <b>&lt; 5 months since last vaccination</b>                      |                                             | N = 8                        | N = 3                        | 3 / 8                                       | 0 / 3                        |
|                                                                  |                                             | <b>5500</b><br>(2150, 14069) | <b>5304</b><br>(1144, 24600) | <b>37·5%</b><br>(8·5, 75·5)                 | <b>0</b><br>(0, 70·8)        |
|                                                                  | <b>GMT ratio or SRR difference (95% CI)</b> | <b>1·04</b> (0·16, 6·64)     |                              | <b>37·5%</b> (-29·3, 70·6)                  |                              |
| <b>≥ 5 months since last vaccination</b>                         |                                             | N = 377                      | N = 371                      | 248 / 377                                   | 193 / 371                    |
|                                                                  |                                             | <b>5485</b><br>(5016, 5998)  | <b>3801</b><br>(3475, 4158)  | <b>65·8%</b><br>(60·8, 70·6)                | <b>52·0%</b><br>(46·8, 57·2) |
|                                                                  | <b>GMT ratio or SRR difference (95% CI)</b> | <b>1·44</b> (1·27, 1·64)     |                              | <b>13·8%</b> (6·7, 20·7)                    |                              |
| <b>Neutralising antibodies against SARS-CoV-2 Omicron BA.4/5</b> |                                             |                              |                              |                                             |                              |
| <b>&lt; 5 months since last vaccination</b>                      |                                             | N = 8                        | N = 3                        | 4 / 8                                       | 1 / 3                        |
|                                                                  |                                             | <b>2339</b><br>(560, 9776)   | <b>5146</b><br>(498, 53218)  | <b>50·0</b><br>(15·7, 84·3)                 | <b>33·3</b><br>(0·8, 90·6)   |
|                                                                  | <b>GMT ratio or SRR difference (95% CI)</b> | <b>0·45</b> (0·03, 7·68)     |                              | <b>16·7%</b> (-44·4, 63·6)                  |                              |
| <b>≥ 5 months since last vaccination</b>                         |                                             | N = 377                      | N = 371                      | 265 / 377                                   | 216 / 371                    |
|                                                                  |                                             | <b>2161</b><br>(1881, 2483)  | <b>1635</b><br>(1422, 1880)  | <b>70·3%</b><br>(65·4, 74·9)                | <b>58·2%</b><br>(53·0, 63·3) |
|                                                                  | <b>GMT ratio or SRR difference (95% CI)</b> | <b>1·32</b> (1·09, 1·61)     |                              | <b>12·1%</b> (5·2, 18·8)                    |                              |

\* GMT and GMT ratio calculated using an ANCOVA model.

---

**Supplementary table 7.**

Duration of solicited local reactions in days (Safety Set).

---

|                                     |                  | <b>ARCT-154</b>  | <b>Comirnaty</b> |
|-------------------------------------|------------------|------------------|------------------|
| <b>Any solicited local reaction</b> | n                | 398              | 395              |
|                                     | <b>Mean ± SD</b> | <b>4·7 ± 2·4</b> | <b>4·5 ± 1·6</b> |
|                                     | Median           | 4·0              | 4·0              |
| Injection site pain                 | n                | 352              | 358              |
|                                     | <b>Mean ± SD</b> | <b>3·5 ± 1·4</b> | <b>3·6 ± 1·4</b> |
|                                     | Median           | 3·0              | 3·0              |
| Injection site tenderness           | n                | 388              | 391              |
|                                     | <b>Mean ± SD</b> | <b>4·6 ± 2·3</b> | <b>4·4 ± 1·6</b> |
|                                     | Median           | 4·0              | 4·0              |
| Injection site pain swelling        | n                | 59               | 97               |
|                                     | <b>Mean ± SD</b> | <b>3·0 ± 1·2</b> | <b>3·4 ± 1·7</b> |
|                                     | Median           | 3·0              | 3·0              |
| Injection site erythema             | n                | 52               | 85               |
|                                     | <b>Mean ± SD</b> | <b>4·9 ± 2·8</b> | <b>3·2 ± 1·7</b> |
|                                     | Median           | 5·0              | 3·0              |
| Injection site induration           | n                | 52               | 81               |
|                                     | <b>Mean ± SD</b> | <b>3·9 ± 1·8</b> | <b>3·7 ± 2·1</b> |
|                                     | Median           | 3·0              | 3·0              |

---



---

**Supplementary table 8.**Duration of solicited systemic adverse events in days

---

|                                  |                  | <b>ARCT-154</b>  | <b>Comirnaty</b> |
|----------------------------------|------------------|------------------|------------------|
| <b>Any solicited systemic AE</b> | n events         | 276              | 255              |
|                                  | <b>Mean ± SD</b> | <b>3·0 ± 1·4</b> | <b>3·0 ± 1·5</b> |
|                                  | Median           | 3·0              | 2·0              |
| Pyrexia                          | n events         | 84               | 76               |
|                                  | <b>Mean ± SD</b> | <b>2·0 ± 0·5</b> | <b>1·8 ± 0·6</b> |
|                                  | Median           | 2·0              | 2·0              |
| Arthralgia                       | n events         | 112              | 113              |
|                                  | <b>Mean ± SD</b> | <b>2·6 ± 1·2</b> | <b>2·5 ± 1·2</b> |
|                                  | Median           | 2·0              | 2·0              |
| Chills                           | n events         | 126              | 103              |
|                                  | <b>Mean ± SD</b> | <b>2·4 ± 0·9</b> | <b>2·2 ± 0·5</b> |
|                                  | Median           | 2·0              | 2·0              |
| Diarrhoea                        | n events         | 28               | 17               |
|                                  | <b>Mean ± SD</b> | <b>2·5 ± 1·0</b> | <b>3·0 ± 2·2</b> |
|                                  | Median           | 2·0              | 2·0              |
| Dizziness                        | n events         | 25               | 13               |
|                                  | <b>Mean ± SD</b> | <b>2·8 ± 1·2</b> | <b>2·5 ± 1·2</b> |
|                                  | Median           | 2·0              | 2·0              |
| Headache                         | n events         | 165              | 125              |
|                                  | <b>Mean ± SD</b> | <b>2·7 ± 1·1</b> | <b>2·8 ± 1·5</b> |
|                                  | Median           | 2·0              | 2·0              |
| Malaise                          | n events         | 188              | 176              |
|                                  | <b>Mean ± SD</b> | <b>2·9 ± 1·4</b> | <b>2·7 ± 1·3</b> |
|                                  | Median           | 2·0              | 2·0              |
| Nausea                           | n events         | 21               | 16               |
|                                  | <b>Mean ± SD</b> | <b>2·4 ± 0·9</b> | <b>2·7 ± 2·0</b> |
|                                  | Median           | 2·0              | 2·0              |
| Vomiting                         | n events         | 2                | 2                |
|                                  | <b>Mean ± SD</b> | <b>2·0 ± 0</b>   | <b>2·0 ± 0</b>   |
|                                  | Median           | 2·0              | 2·0              |
| Myalgia                          | n events         | 123              | 100              |
|                                  | <b>Mean ± SD</b> | <b>3·9 ± 1·8</b> | <b>3·7 ± 2·1</b> |
|                                  | Median           | 2·0              | 3·0              |

---

---

**Supplementary table 9.**

Rates of unsolicited adverse events according to MedDRA classifications in the two study groups from Day 1 to Day 29 (FAS)

---

|                                                          | <b>ARCT-154</b> | <b>Comirnaty</b> |
|----------------------------------------------------------|-----------------|------------------|
| N =                                                      | 420             | 408              |
| <b>Any unsolicited adverse event, n participants (%)</b> | 81 (19.3)       | 111 (27.2)       |
| Blood and lymphatic disorders                            | 2 (0.5)         | 7 (1.7)          |
| Cardiac disorders                                        | 3 (0.7)         | 0                |
| Eye disorders                                            | 2 (0.5)         | 2 (0.5)          |
| Gastrointestinal disorders                               | 11 (2.6)        | 13 (3.2)         |
| General disorders and administration site conditions     | 28 (6.7)        | 47 (11.5)        |
| Hepatobiliary disorders                                  | 1 (0.2)         | 0                |
| Immune system disorders                                  | 1 (0.2)         | 1 (0.2)          |
| Infections and infestations                              | 7 (1.7)         | 14 (3.4)         |
| Injury, poisoning and procedural complications           | 2 (0.5)         | 3 (0.7)          |
| Investigations                                           | 5 (1.2)         | 6 (1.5)          |
| Metabolism and nutrition disorders                       | 1 (0.2)         | 0                |
| Musculoskeletal and connective tissue disorders          | 10 (2.4)        | 15 (3.7)         |
| Nervous system disorders                                 | 11 (2.6)        | 9 (2.2)          |
| Psychiatric disorders                                    | 0               | 1 (0.2)          |
| Renal and urinary disorders                              | 0               | 1 (0.2)          |
| Reproductive system and breast disorders                 | 1 (0.2)         | 1 (0.2)          |
| Respiratory, thoracic and mediastinal disorders          | 8 (1.9)         | 8 (2.0)          |
| Skin and subcutaneous tissue disorders                   | 6 (1.4)         | 5 (1.2)          |
| Vascular disorders                                       | 1 (0.2)         | 3 (0.7)          |

---
